# Supplementary material for: Surfactant bilayer coatings in narrow-bore capillaries in capillary electrophoresis
Source: Royal Society of Chemistry journal article supplement (doi:10.1039/c0an00279h), 2010-01-01
Supplement: c0an00279h.pdf [file c0an00279h.pdf]

# **Surfactant bilayer coatings in narrow-bore capillaries in capillary electrophoresis**

Makedonka D. Gulcev, Teague M. McGinitie, Mahmoud F. Bahnasy and Charles A. Lucy\*

Department of Chemistry  
University of Alberta  
Gunning / Lemieux Chemistry Centre  
Edmonton, Alberta, Canada T6G 2G2

\* To whom correspondence should be addressed. E-mail: [charles.lucy@ualberta.ca](mailto:charles.lucy@ualberta.ca)

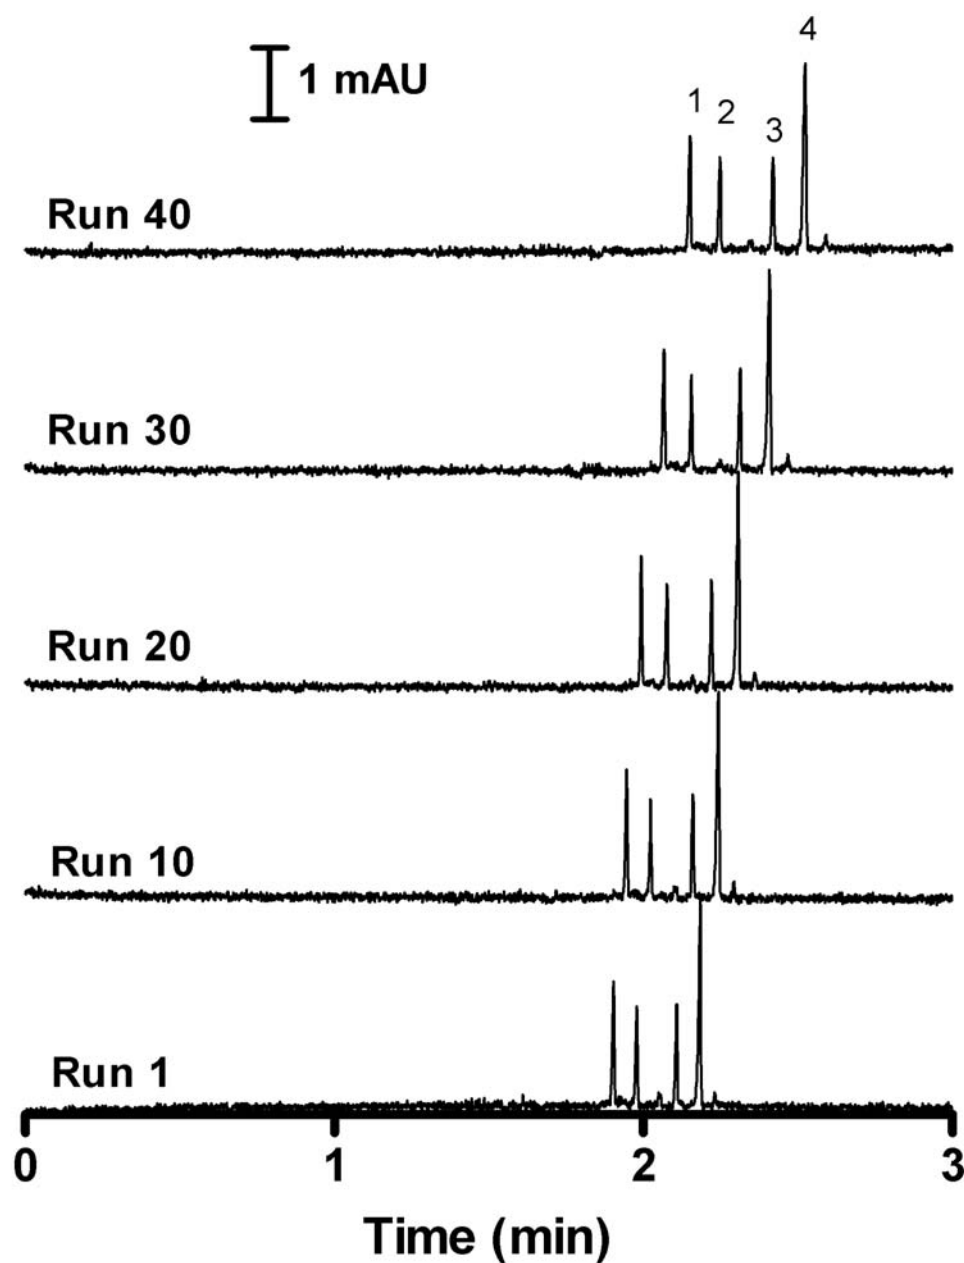

**Fig. S1** Separation of Cationic Proteins on 10  $\mu\text{m}$  i.d. capillary using 2 mM DDAB coating. The electropherograms have been offset along the y-axis to show successive runs. Proteins labeled: (1)  $\alpha$ -chymotrypsinogen A, (2) ribonuclease A, (3) cytochrome *c*, and (4) lysozyme. Cationic surfactant coating was reconstituted in 50 mM Li acetate pH 5 buffer. Applied voltage, -10 kV; capillary, 32 cm x 10  $\mu\text{m}$  i.d. (23 cm to detector); separation buffer, 50 mM Li Acetate pH 5;  $\lambda$  (nm), 214; 0.2 mg/mL protein sample dissolved in water and injected hydrodynamically at 5 kPa for 45 s.
